# Supplementary material
Source: MDPI journal article supplement (https://www.mdpi.com/2076-3263/13/2/56)
Supplement: s1 [file s1]

**Table S1.** Main diatom species in core PSh-6066 with remarks to their environmental characteristics.

| Diatom species                                                                        | Environmental characteristic |                                      |                           |    |
|---------------------------------------------------------------------------------------|------------------------------|--------------------------------------|---------------------------|----|
|                                                                                       | Habitat                      | Salinity tolerance (Simonsen&Pankow) | Distribution              |    |
|                                                                                       |                              |                                      | Phytogeographic al groups |    |
| Relatively warm-water species                                                         |                              |                                      |                           |    |
| <i>Actinocyclus curvatus</i> Janisch                                                  | p                            | m                                    | c                         | n  |
| <i>Actinoptychus senarius</i> (Ehrenberg) Ehrenberg                                   | p                            | m                                    | c                         | on |
| <i>Coscinodiscus asteromphalus</i> Ehrenberg                                          | p                            | m                                    | b                         | on |
| <i>Coscinodiscus perforatus</i> Ehrenberg                                             | p                            | m                                    | b                         | on |
| <i>Coscinodiscus radiatus</i> Ehrenberg                                               | p                            | m                                    | b                         | n  |
| <i>Thalassiosira angustelineata</i> (A.Schmidt) G.Fryxell et Hasle                    | p                            | m                                    | c                         | n  |
| <i>Thalassiosira latimarginata</i> Makarova                                           | p                            | m                                    | c                         | n  |
| <i>Shionodiscus oestrupii</i> (Ostenfeld) A.J.Alverson, S.-H.Kang & E.C.Theriot       | p                            | m                                    |                           | on |
| Relatively cold-water species                                                         |                              |                                      |                           |    |
| <i>Coscinodiscus oculus-iridis</i> (Ehrenberg) Ehrenberg                              | p                            | m                                    | ab                        | n  |
| <i>Coscinodiscus marginatus</i> Ehrenberg                                             | p                            | m                                    | ab                        | n  |
| Relatively cold-water species, which develop in the plankton of the marginal ice zone |                              |                                      |                           |    |
| <i>Bacterosira bathyomphala</i> (Cleve) Syvertsen et Hasle                            | p                            | m                                    | c                         | n  |
| <i>Chaetoceros furcellatus</i> Bailey                                                 | p                            | m                                    | c                         | n  |
| <i>Porosira glacialis</i> (Grunow) Jørgensen                                          | p                            | m                                    | c                         | n  |
| <i>Rhizosolenia hebetata</i> f. <i>hebetata</i> Bailey                                | p                            | m                                    | c                         | on |
| <i>Thalassiosira nordenskioeldii</i> Cleve                                            | p                            | m                                    | c                         | n  |
| Sea ice species                                                                       |                              |                                      |                           |    |
| <i>Attheya septentrionalis</i> (Østrup) Crawford                                      | p                            | m                                    | ab                        | n  |
| <i>Melosira arctica</i> Dickie                                                        | p                            | m                                    | ab                        | s  |
| <i>Nitzschia frigida</i> Grunow                                                       | p                            | m                                    | ab                        | n  |
| Freshwater species                                                                    |                              |                                      |                           |    |
| <i>Stephanodiscus neoastreae</i> Håkansson et Hickel                                  | p                            | fr                                   | c                         |    |
| <i>Aulacoseira ambigua</i> (Grunow) Simonsen                                          | p                            | fr                                   | c                         |    |
| <i>Cyclotella meneghiniana</i> Kützing                                                | p                            | fr                                   | c                         |    |
| <i>Diploneis elliptica</i> (Kützing) Cleve                                            | b                            | fr                                   | c                         |    |
| Sublittoral species                                                                   |                              |                                      |                           |    |
| <i>Paralia sulcata</i> (Ehrenberg) Cleve                                              | pb                           | m                                    | b                         | s  |
| <i>Delphineis surirella</i> (Ehrenberg) Andrews                                       | b                            | m                                    |                           | s  |
| <i>Grammatophora hamulifera</i> Kützing                                               | b                            | m                                    | c                         | s  |
| <i>Grammatophora marina</i> (Lyngbye) Kützing                                         | b                            | m                                    | c                         | s  |

Environmental characteristics: p – planktonic, pb – meroplanktonic, b – benthic; salinity tolerance: m – marine, fr – freshwater; phytogeographical groups: c – cosmopolitan, b – boreal, ab – arctoboreal; by belonging to the zones of the ocean: s – sublittoral, n – neritic, on – panthalassic.
